# Supplementary material for: Interleukin-6 and intrapulmonary shunt
Source: PubMed Central journal article supplement — Eur Respir J. 2021 Aug 12;58(2):2101292. doi: 10.1183/13993003.01292-2021 (PMC8358234; doi:10.1183/13993003.01292-2021), 2021-08-12

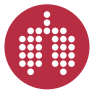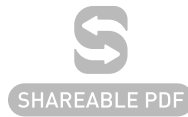

# Interleukin-6 and intrapulmonary shunt

Francisco Perez-Vizcaino<sup>1,2,3</sup>, Laura Moreno<sup>1,2,3</sup> and José A. Lorente<sup>2,4,5</sup>

<sup>1</sup>Dept of Pharmacology and Toxicology, School of Medicine, Universidad Complutense de Madrid, Madrid, Spain. <sup>2</sup>CIBER de Enfermedades Respiratorias (CIBERES), Madrid, Spain. <sup>3</sup>Instituto de Investigación Sanitaria Gregorio Marañón (IISGM), Madrid, Spain. <sup>4</sup>Critical Care Service, Hospital Universitario de Getafe, Madrid, Spain. <sup>5</sup>Universidad Europea, Madrid, Spain.

Francisco Perez-Vizcaino (fperez@med.ucm.es)

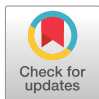

Shareable abstract (@ERSpublications)

Based on animal studies and indirect clinical evidence, it may be speculated that IL-6 has a pathophysiological role in intrapulmonary shunt associated to COVID-19 <https://bit.ly/3whQVqd>

**Cite this article as:** Perez-Vizcaino F, Moreno L, Lorente JA. Interleukin-6 and intrapulmonary shunt. *Eur Respir J* 2021; 58: 2101292 [DOI: 10.1183/13993003.01292-2021].

This single-page version can be shared freely online.

Copyright ©The authors 2021.

This version is distributed under the terms of the Creative Commons Attribution Non-Commercial Licence 4.0. For commercial reproduction rights and permissions contact [permissions@ersnet.org](mailto:permissions@ersnet.org)

Received: 5 May 2021  
Accepted: 6 June 2021

*To the Editor:*

We read with interest the article by Kotwica *et al.* [1] showing the utility of clinical pulse oximetry measurements to quantify shunt and ventilation–perfusion mismatch and their predictive value in severe coronavirus disease 2019 (COVID-19). The authors found that shunt correlated with markers of activated inflammatory response (*i.e.* C-reactive protein) but not those of activated coagulation (such as D-dimer). Their results reinforce the growing evidence for the role of impaired hypoxic pulmonary vasoconstriction (HPV) as a primary cause for severe acute respiratory syndrome coronavirus 2 (SARS-CoV-2)-induced hypoxaemia [2].

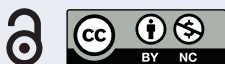

Supplement: ERJ-01292-2021.Shareable.pdf [file ERJ-01292-2021.Shareable.pdf]
